# Supplementary material
Source: PubMed Central journal article supplement (PMC6822209)
Supplement: 34058_Appendix_1.pdf [file 34058_Appendix_1.pdf]

## APPENDIX 1

Actual search strings:

### PubMed – 1/17/18 – 339 Results

(((((("sex"[MeSH] OR "sex"[TW] OR "gender identity"[MeSH] OR "gender"[TW] OR "sex differences"[TW]))) AND ("brain concussion"[MeSH] OR "concussion"[TW] OR "Concussions"[TW] OR "traumatic brain injury"[TW])) AND ("sports"[MeSH] OR "sports"[TW] OR "sport"[TW] OR "athletes"[TW])) AND ("incidence"[MeSH] OR "incidence"[TW] OR "epidemiology"[MeSH] OR "epidemiology"[TW] OR "symptoms"[TW] OR "injury rate"[TW]))

### EMBASE – 1/17/18 – 484 results

'sex'/exp OR  
sex:ti,ab,de,tn OR  
'gender identity'/exp OR  
gender:ti,ab,de,tn OR  
"sex differences":ti,ab,de,tn

AND

'brain concussion'/exp OR  
concussion:ti,ab,de,tn OR  
Concussions:ti,ab,de,tn OR  
"traumatic brain injury":ti,ab,de,tn

AND

'sport'/exp OR  
sports:ti,ab,de,tn OR  
sport:ti,ab,de,tn OR  
athletes:ti,ab,de,tn

AND

'incidence'/exp OR  
incidence:ti,ab,de,tn OR  
'epidemiology'/exp OR  
epidemiology:ti,ab,de,tn OR

symptoms:ti,ab,de,tn OR  
"injury rate":ti,ab,de,tn

### **COCHRANE – 1/17/18 – 6 results**

[mh sex] OR  
sex:ti,ab,kw OR  
[mh "gender identity"] OR  
gender:ti,ab,kw OR  
"sex differences":ti,ab,kw

AND

[mh "brain concussion"] OR  
concussion:ti,ab,kw OR  
Concussions:ti,ab,kw OR  
"traumatic brain injury":ti,ab,kw

AND

[mh sports] OR  
sports:ti,ab,kw OR  
sport:ti,ab,kw OR  
athletes:ti,ab,kw

AND

[mh incidence] OR  
incidence:ti,ab,kw OR  
[mh epidemiology] OR  
epidemiology:ti,ab,kw OR  
symptoms:ti,ab,kw OR  
"injury rate":ti,ab,kw
