# Supplementary material
Source: PubMed Central journal article supplement (PMC6822209)
Supplement: 34058_Appendix_2.pdf [file 34058_Appendix_2.pdf]

## Appendix 2

**Table A1. Characteristics of Studies Included in the Meta-analysis**

| First Author | Year Published | Study Design  | Years Included | Country | Gender-Comparable Sports                                                                                                                                                                                        | Database           | Population                                           |
|--------------|----------------|---------------|----------------|---------|-----------------------------------------------------------------------------------------------------------------------------------------------------------------------------------------------------------------|--------------------|------------------------------------------------------|
| Agel         | 2010           | Retrospective | 2000-2007      | USA     | Ice Hockey                                                                                                                                                                                                      | NCAA-ISS           | Collegiate                                           |
| Baugh        | 2017           | Retrospective | 2013-2015      | USA     | Volleyball                                                                                                                                                                                                      | NCAA-ISP           | Collegiate                                           |
| Beis         | 2007           | Prospective   | Not provided   | Greece  | Taekwondo                                                                                                                                                                                                       | None               | Youth, Adults<br>(18+ years)                         |
| Black        | 2017           | Retrospective | 2008-2011      | Canada  | Soccer, Volleyball, Basketball,<br>Ice Hockey, Tennis, Swimming,<br>Badminton, Cross-Country,<br>Track and Field                                                                                                | None               | Collegiate                                           |
| Blumenfeld   | 2016           | Prospective   | 2015-2016      | USA     | Water Polo                                                                                                                                                                                                      | None               | High School,<br>Collegiate,<br>Adults (21+<br>years) |
| Borowski     | 2008           | Retrospective | 2005-2007      | USA     | Basketball                                                                                                                                                                                                      | High School<br>RIO | High School                                          |
| Campbell     | 2018           | Prospective   | 2013-2014      | USA     | Baseball/Softball, Basketball,<br>Cross-Country, Diving,<br>Football, Golf, Horseback<br>Riding, Lacrosse, Snow Sports,<br>Soccer, Cheerleading,<br>Swimming, Tennis, Track and<br>Field, Volleyball, Wrestling | None               | Middle and<br>High School                            |
| Castile      | 2012           | Retrospective | 2005-2010      | USA     | Soccer, Basketball,<br>Baseball/Softball                                                                                                                                                                        | High School<br>RIO | High School                                          |
| Collins      | 2008           | Retrospective | 2005-2006      | USA     | Rugby                                                                                                                                                                                                           | High School<br>RIO | High School                                          |
| Comstock     | 2015           | Retrospective | 2005-2014      | USA     | Soccer                                                                                                                                                                                                          | High School<br>RIO | High School                                          |
| Covassin     | 2016           | Retrospective | 2004-2009      | USA     | Baseball/Softball, Basketball,<br>Ice Hockey, Lacrosse, Soccer                                                                                                                                                  | NCAA-ISP           | Collegiate                                           |

|             |      |                               |           |             |                                                                                     |                           |                           |
|-------------|------|-------------------------------|-----------|-------------|-------------------------------------------------------------------------------------|---------------------------|---------------------------|
| Covassin    | 2003 | Retrospective                 | 1997-2000 | USA         | Soccer, Basketball, Gymnastics, Baseball/Softball, Lacrosse                         | NCAA-ISS                  | Collegiate                |
| Currie      | 2016 | Retrospective                 | 2009-2014 | USA         | Cheerleading                                                                        | High School RIO           | High School               |
| Davis-Hayes | 2017 | Retrospective                 | 2000-2014 | USA         | Soccer, Basketball, Baseball/Softball, Diving, Pole Vaulting                        | None                      | Collegiate                |
| Fraser      | 2017 | Retrospective                 | 2009-2015 | USA         | Baseball/Softball, Basketball, Lacrosse, Soccer                                     | NCAA-ISP                  | Collegiate                |
| Fuller      | 2005 | Prospective                   | 1998-2004 | UK          | Soccer                                                                              | None                      | Adults (18+ years)        |
| Gessel      | 2007 | Retrospective                 | 2005-2006 | USA         | Soccer, Basketball, Baseball/Softball                                               | High School RIO, NCAA-ISS | High School, Collegiate   |
| Hootman     | 2007 | Retrospective                 | 1988-2004 | USA         | Baseball/Softball, Basketball, Gymnastics, Lacrosse, Soccer                         | NCAA-ISS                  | Collegiate                |
| Kerr        | 2017 | Prospective                   | 2015-2016 | USA         | Baseball/Softball, Basketball, Soccer, Track                                        | None                      | Middle School             |
| Khodae      | 2016 | Retrospective                 | 2005-2014 | USA         | Soccer                                                                              | High School RIO           | High School               |
| Koh         | 2004 | Prospective                   | 2001      | South Korea | Taekwondo                                                                           | None                      | Youth (11-19 years)       |
| Lincoln     | 2011 | Prospective                   | 1997-2008 | USA         | Lacrosse, Basketball, Baseball/Softball, Soccer                                     | None                      | High School               |
| Lincoln     | 2007 | Prospective and Retrospective | 2000-2003 | USA         | Lacrosse                                                                            | NCAA-ISS                  | High School, Collegiate   |
| Lopez       | 2017 | Prospective                   | 2010-2013 | USA         | Rugby                                                                               | None                      | Youth, Adults (18+ years) |
| Marar       | 2012 | Retrospective                 | 2008-2010 | USA         | Lacrosse, Soccer, Basketball, Volleyball, Baseball/Softball, Swim/Dive, Track/Field | High School RIO           | High School               |

|            |      |               |           |        |                                                                                                                  |                                                |                         |
|------------|------|---------------|-----------|--------|------------------------------------------------------------------------------------------------------------------|------------------------------------------------|-------------------------|
| O'Connor   | 2017 | Prospective   | 2011-2014 | USA    | Baseball/Softball, Basketball, Crew, Cross-Country, Golf, Lacrosse, Soccer, Track and Field, Swimming and Diving | NATION                                         | High School             |
| Pennington | 2017 | Prospective   | 2016      | UK     | Quidditch                                                                                                        | None                                           | Adults (18+)            |
| Roos       | 2016 | Retrospective | 2009-2015 | USA    | Basketball                                                                                                       | NATION, NCAA-ISP                               | High School, Collegiate |
| Roos       | 2017 | Retrospective | 2009-2015 | USA    | Soccer                                                                                                           | NCAA-ISP                                       | Collegiate              |
| Rosene     | 2017 | Retrospective | 2009-2015 | USA    | Ice Hockey                                                                                                       | NCAA-ISP                                       | Collegiate              |
| Schallmo   | 2017 | Retrospective | 2005-2014 | USA    | Soccer, Basketball, Baseball/Softball                                                                            | High School RIO                                | High School             |
| Schick     | 2003 | Prospective   | 1998-1999 | Canada | Ice Hockey                                                                                                       | Canadian Intercollegiate Sport Injury Registry | Collegiate              |
| Schulz     | 2004 | Prospective   | 1996-1999 | USA    | Baseball/Softball, Basketball, Soccer, Track                                                                     | None                                           | High School             |
| Simmons    | 2017 | Retrospective | 2009-2014 | USA    | Ice Hockey                                                                                                       | NCAA-ISP                                       | Collegiate              |
| Wolf       | 2009 | Retrospective | 2002-2007 | USA    | Swimming                                                                                                         | Sports Injury Monitoring System                | Collegiate              |
| Xiang      | 2014 | Retrospective | 2008-2012 | USA    | Lacrosse                                                                                                         | High School RIO                                | High School             |
| Yard       | 2008 | Retrospective | 2005-2007 | USA    | Soccer                                                                                                           | High School RIO                                | High School             |
| Zuckerman  | 2015 | Retrospective | 2009-2014 | USA    | Ice Hockey, Basketball, Soccer, Lacrosse, Baseball/Softball, Swim and Dive, Tennis, Track, Cross-Country         | NCAA-ISP                                       | Collegiate              |

---

Abbreviations: NATION: National Athletic Treatment, Injury, and Outcomes Network; NCAA-ISP: National Collegiate Athletic Association-Injury Surveillance Program; RIO: Reporting Information Online

**Table A2. Quality Assessment Results**

| Study                  | Selection* |   |   |   |   |   | Comparability <sup>†</sup> | Outcome <sup>‡</sup> |   |   |   | Quality Assessment |
|------------------------|------------|---|---|---|---|---|----------------------------|----------------------|---|---|---|--------------------|
|                        | A          | B | C | D | E | F |                            | A                    | B | C | D |                    |
| Agel 2010              | 1          | 0 | 1 | 0 |   |   | 1                          | 1                    | 1 | 0 |   | Fair               |
| Baugh 2018             | 1          | 0 | 1 | 0 |   |   | 1                          | 1                    | 1 | 0 |   | Fair               |
| Beis 2007 <sup>#</sup> | 1          |   | 1 |   | 1 | 0 | 1                          | 1                    |   |   | 1 | Fair               |
| Black 2017             | 1          | 0 | 1 | 0 |   |   | 1                          | 1                    | 1 | 1 |   | Fair               |
| Blumenfeld 2016        | 1          | 0 | 0 | 1 |   |   | 2                          | 0                    | 0 | 0 |   | Poor               |
| Borowski 2008          | 1          | 0 | 1 | 0 |   |   | 2                          | 1                    | 1 | 1 |   | Fair               |
| Campbell 2018          | 1          | 0 | 1 | 1 |   |   | 1                          | 1                    | 0 | 0 |   | Poor               |
| Castile 2012           | 1          | 0 | 1 | 0 |   |   | 1                          | 1                    | 1 | 1 |   | Fair               |
| Collins 2008           | 1          | 0 | 1 | 0 |   |   | 1                          | 1                    | 1 | 1 |   | Fair               |
| Comstock 2015          | 1          | 0 | 1 | 0 |   |   | 2                          | 1                    | 1 | 1 |   | Fair               |
| Covassin 2003          | 1          | 0 | 1 | 0 |   |   | 1                          | 1                    | 0 | 1 |   | Fair               |
| Covassin 2016          | 1          | 0 | 1 | 0 |   |   | 1                          | 1                    | 1 | 0 |   | Fair               |
| Currie 2016            | 1          | 0 | 1 | 0 |   |   | 1                          | 1                    | 1 | 1 |   | Fair               |
| Davis-Hayes 2017       | 1          | 0 | 1 | 0 |   |   | 1                          | 1                    | 1 | 1 |   | Fair               |
| Fraser 2017            | 1          | 0 | 1 | 0 |   |   | 1                          | 1                    | 1 | 1 |   | Fair               |
| Fuller 2005            | 1          | 0 | 1 | 1 |   |   | 1                          | 1                    | 0 | 0 |   | Fair               |
| Gessel 2007            | 1          | 0 | 1 | 0 |   |   | 2                          | 1                    | 1 | 1 |   | Fair               |
| Hootman 2007           | 1          | 0 | 1 | 0 |   |   | 1                          | 1                    | 1 | 1 |   | Fair               |
| Kerr 2017              | 1          | 0 | 1 | 1 |   |   | 1                          | 1                    | 1 | 0 |   | Good               |
| Khodaei 2016           | 1          | 0 | 1 | 0 |   |   | 2                          | 1                    | 1 | 0 |   | Fair               |
| Koh 2004 <sup>#</sup>  | 0          |   | 1 |   | 1 | 0 | 1                          | 1                    |   |   | 1 | Fair               |
| Lincoln 2007           | 1          | 0 | 1 | 0 |   |   | 1                          | 1                    | 1 | 1 |   | Fair               |
| Lincoln 2011           | 1          | 0 | 1 | 0 |   |   | 1                          | 1                    | 1 | 1 |   | Fair               |
| Lopez 2017             | 1          | 0 | 1 | 0 |   |   | 0                          | 1                    | 0 | 0 |   | Poor               |
| Marar 2012             | 1          | 0 | 1 | 0 |   |   | 2                          | 1                    | 1 | 1 |   | Fair               |
| O'Connor 2017          | 1          | 0 | 1 | 0 |   |   | 1                          | 1                    | 1 | 1 |   | Fair               |
| Pennington 2017        | 1          | 0 | 1 | 1 |   |   | 1                          | 0                    | 1 | 1 |   | Good               |
| Roos 2016              | 1          | 0 | 1 | 0 |   |   | 2                          | 1                    | 1 | 0 |   | Fair               |
| Roos 2017              | 1          | 0 | 1 | 0 |   |   | 1                          | 1                    | 1 | 0 |   | Fair               |
| Rosene 2017            | 1          | 0 | 1 | 0 |   |   | 2                          | 1                    | 1 | 1 |   | Fair               |
| Schallmo 2017          | 1          | 0 | 1 | 0 |   |   | 2                          | 1                    | 1 | 1 |   | Fair               |
| Schulz 2004            | 1          | 0 | 1 | 1 |   |   | 1                          | 1                    | 1 | 0 |   | Good               |

|                |   |   |   |   |   |   |   |   |      |
|----------------|---|---|---|---|---|---|---|---|------|
| Schick 2003    | 1 | 0 | 1 | 1 | 1 | 0 | 1 | 0 | Poor |
| Simmons 2017   | 1 | 0 | 1 | 0 | 1 | 1 | 1 | 0 | Fair |
| Wolf 2009      | 1 | 0 | 1 | 0 | 1 | 1 | 1 | 0 | Fair |
| Xiang 2014     | 1 | 0 | 1 | 0 | 1 | 1 | 1 | 1 | Fair |
| Yard 2008      | 1 | 0 | 1 | 0 | 2 | 1 | 1 | 1 | Fair |
| Zuckerman 2015 | 1 | 0 | 1 | 0 | 1 | 1 | 1 | 0 | Fair |

\*Selection criteria - (A) representativeness of the exposed cohort (athletes), 1: truly representative of the average youth, high school, collegiate, or adult athlete in the community, 0: not representative of the average athlete in the community or no description of the derivation of the cohort; (B) selection of the non-exposed cohort, 1: drawn from the same community as the athlete cohort, 0: drawn from a different source than the athlete cohort or no description of the derivation of the non-exposed cohort; (C) ascertainment of exposure, 1: secure record of concussion incident or structured interview, 0: written self-report or no description; (D) demonstration that outcome of interest (concussion incidence) was not present at start of study, 1: yes, 0: no; (E) sample size (cross-sectional studies only), 1: justified and satisfactory, 0: not justified; and (F) non-respondents (cross-sectional studies only), 1: comparability between respondents and non-respondents is established, and the response rate is satisfactory, 0: the response rate is unsatisfactory, the comparability between respondents and non-respondents is unsatisfactory, or there is no description of the response rate or the characteristics of the responders and non-responders.

†Comparability between males and females on the basis of the design or analysis: 1, study includes concussion incidence for males and females in a specific sport; 2, study includes concussion incidence for males and females in a specific sport as well as other factors, such as age or skill level; 0, study does not include concussion incidence for males and females.

‡Outcome criteria - (A) assessment of outcome: 1: independent blind assessment or blind linkage; 0: self-report or no description; (B) was follow-up long enough for outcomes to occur: 1: yes, 0: no; (C) adequacy of follow-up of cohorts: 1: complete follow-up of all subjects or subjects lost to follow-up were unlikely to introduce bias, 0: follow-up rate not adequate or no statement; and (D) statistical test: 1: the statistical test used to analyze data is clearly described and appropriate, and the measurement of the association is presented, including confidence intervals and p values, 0: the statistical test is not appropriate, not described, or incomplete.

#Cross-sectional study

**Figure A1. Forest plot of concussion incidence rate ratios for soccer**

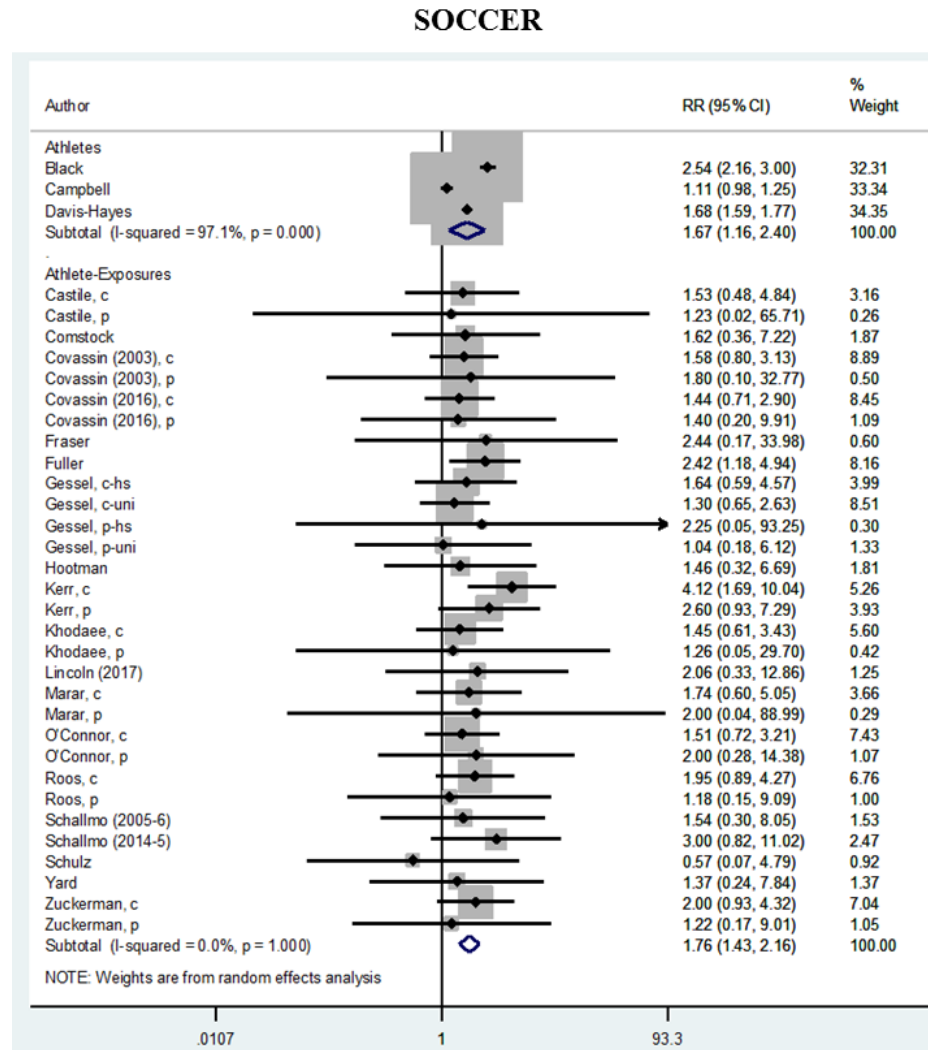

Forest plot of concussion incidence rate ratios for soccer. C: some competition; p: practice only; hs: high school or below; uni: university or above

Figure A2. Forest plot of concussion incidence rate ratios for basketball

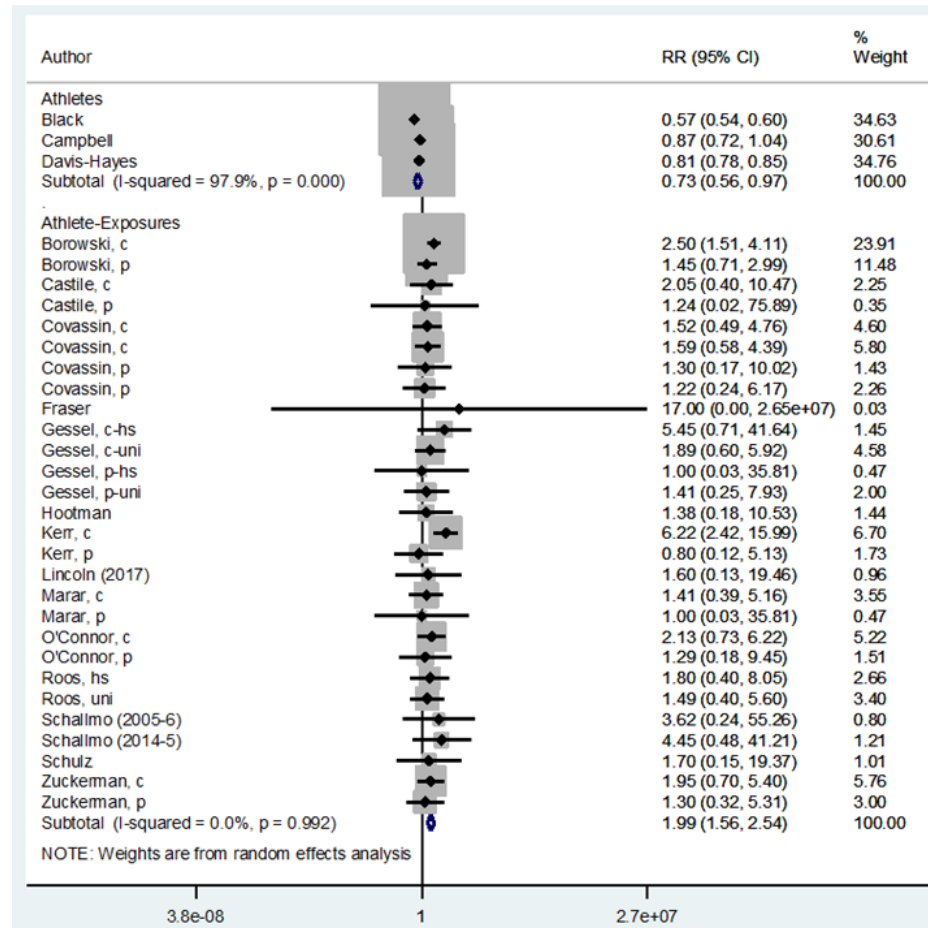

Forest plot of concussion incidence rate ratios for basketball. C: some competition; p: practice only; hs: high school or below; uni: university or above

**Figure A3. Forest plot of concussion incidence rate ratios for lacrosse**

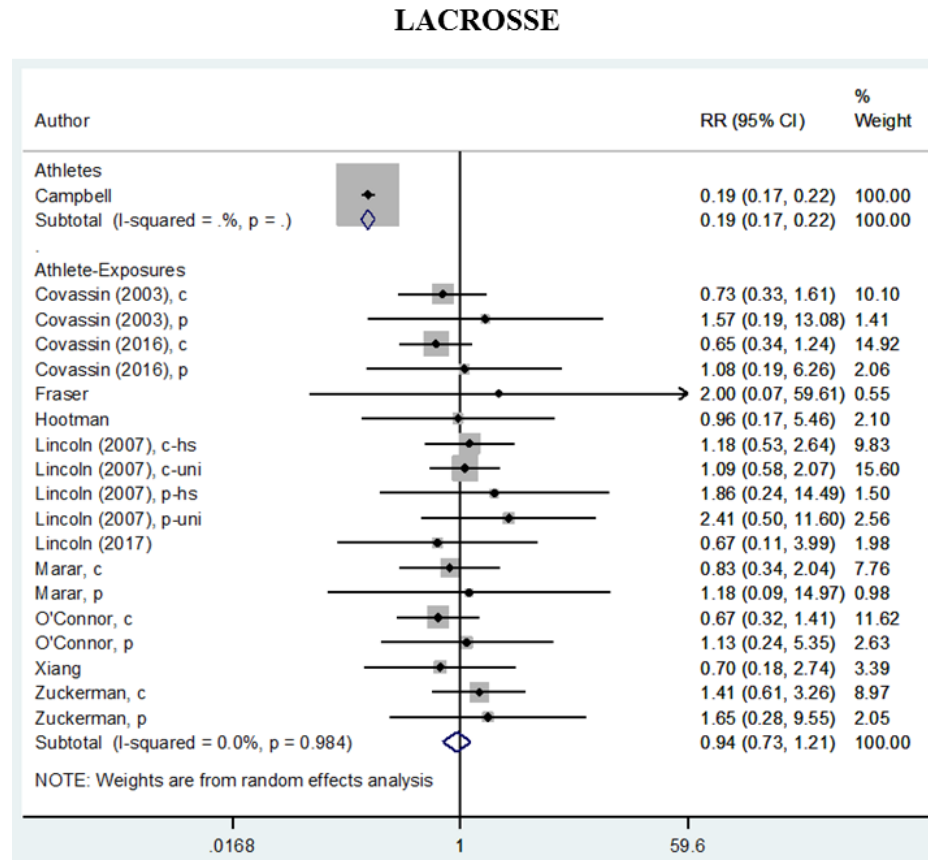

Forest plot of concussion incidence rate ratios for lacrosse. C: some competition; p: practice only; hs: high school or below; uni: university or above



**Figure A4. Forest plot of concussion incidence rate ratios for ice hockey**

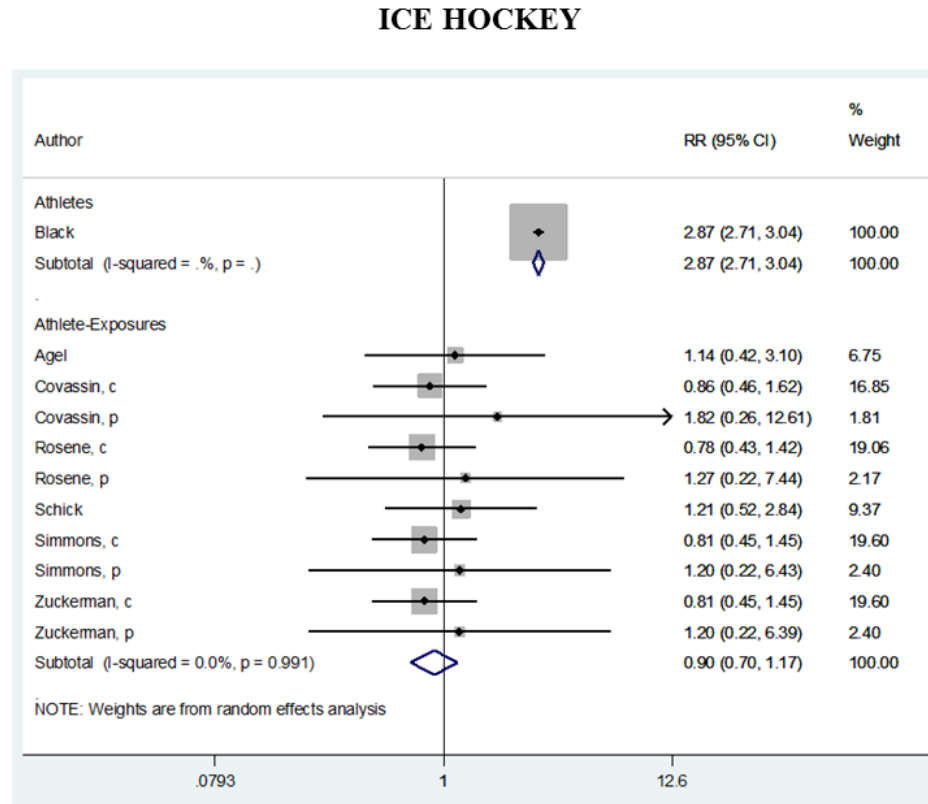

Forest plot of concussion incidence rate ratios for ice hockey. C: some competition; p: practice only; hs: high school or below; uni: university or above

**Figure A5. Forest plot of concussion incidence rate ratios for baseball/softball**

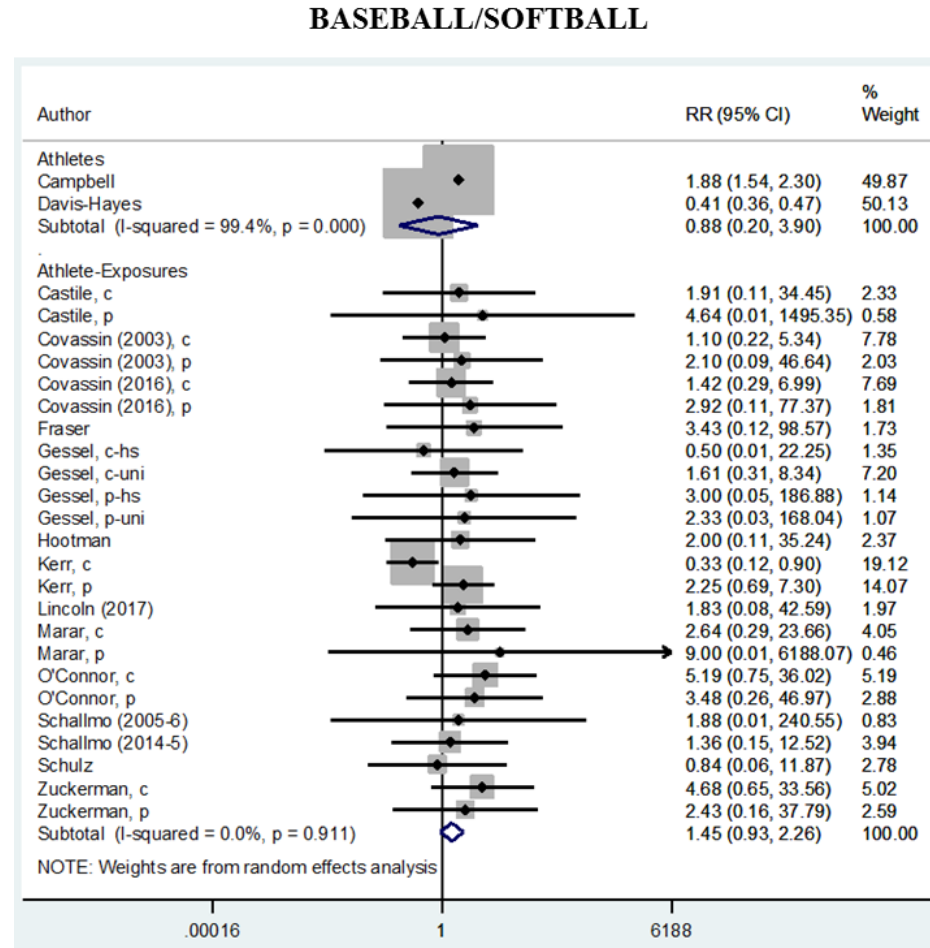

Forest plot of concussion incidence rate ratios for baseball/softball. C: some competition; p: practice only; hs: high school or below; uni: university or above

**Figure A6. Forest plot of concussion incidence rate ratios for track and field**

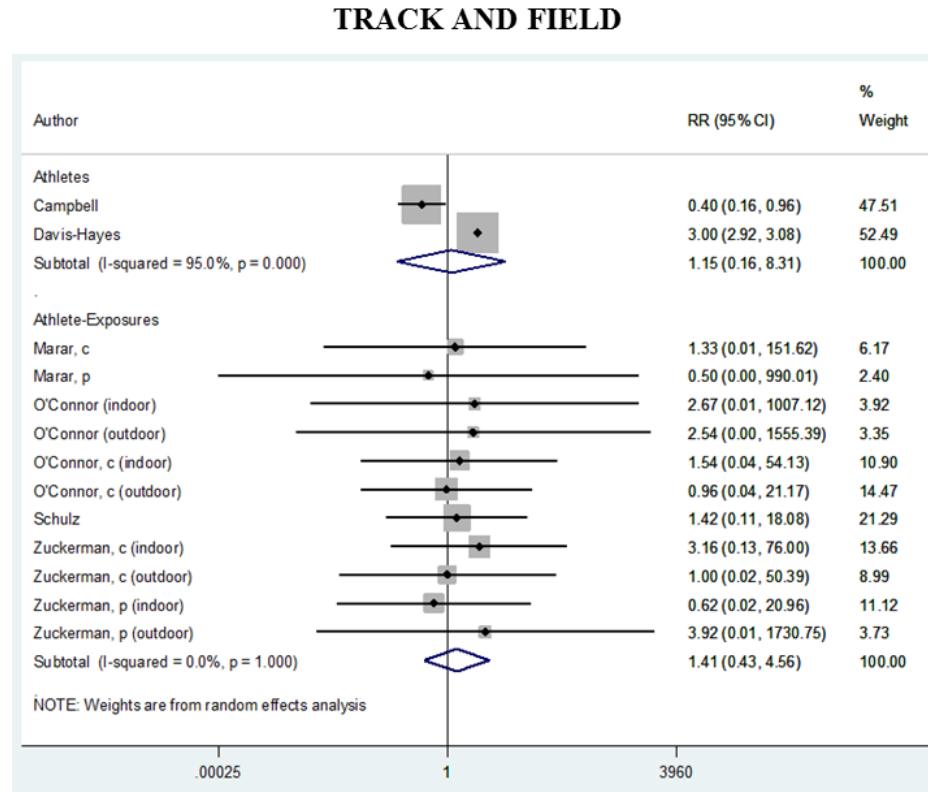

Forest plot of concussion incidence rate ratios for track and field. C: some competition; p: practice only; hs: high school or below; uni: university or above

**Figure A7. Forest plot of concussion incidence rate ratios for swimming/diving**

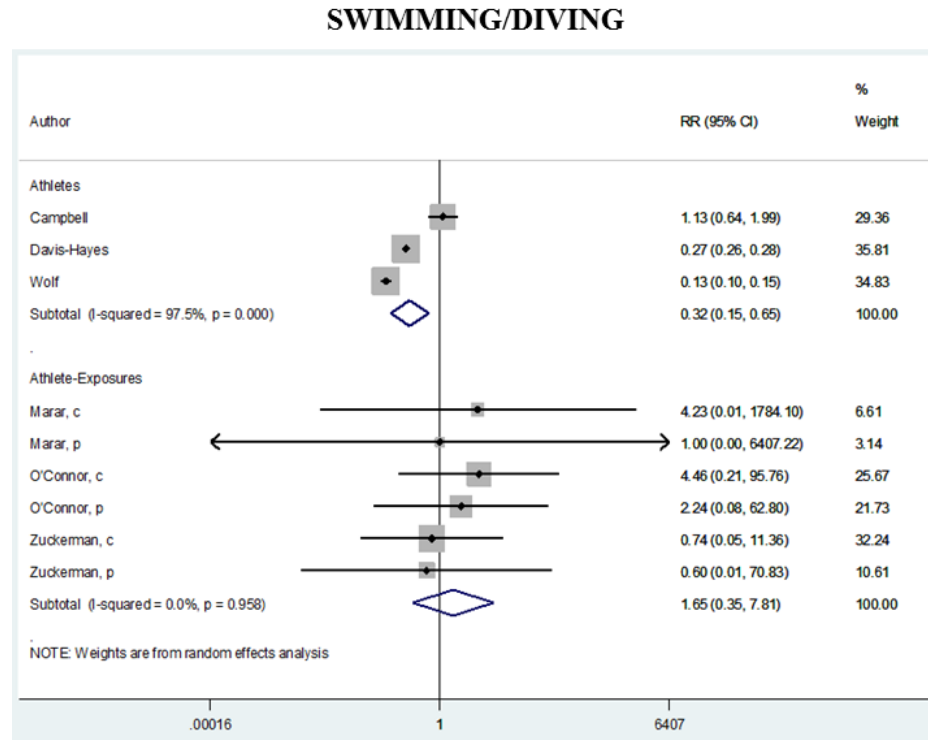

Forest plot of concussion incidence rate ratios for swimming/diving. C: some competition; p: practice only; hs: high school or below; uni: university or above

**Figure A8. Forest plot of concussion incidence rate ratios for other contact sports**

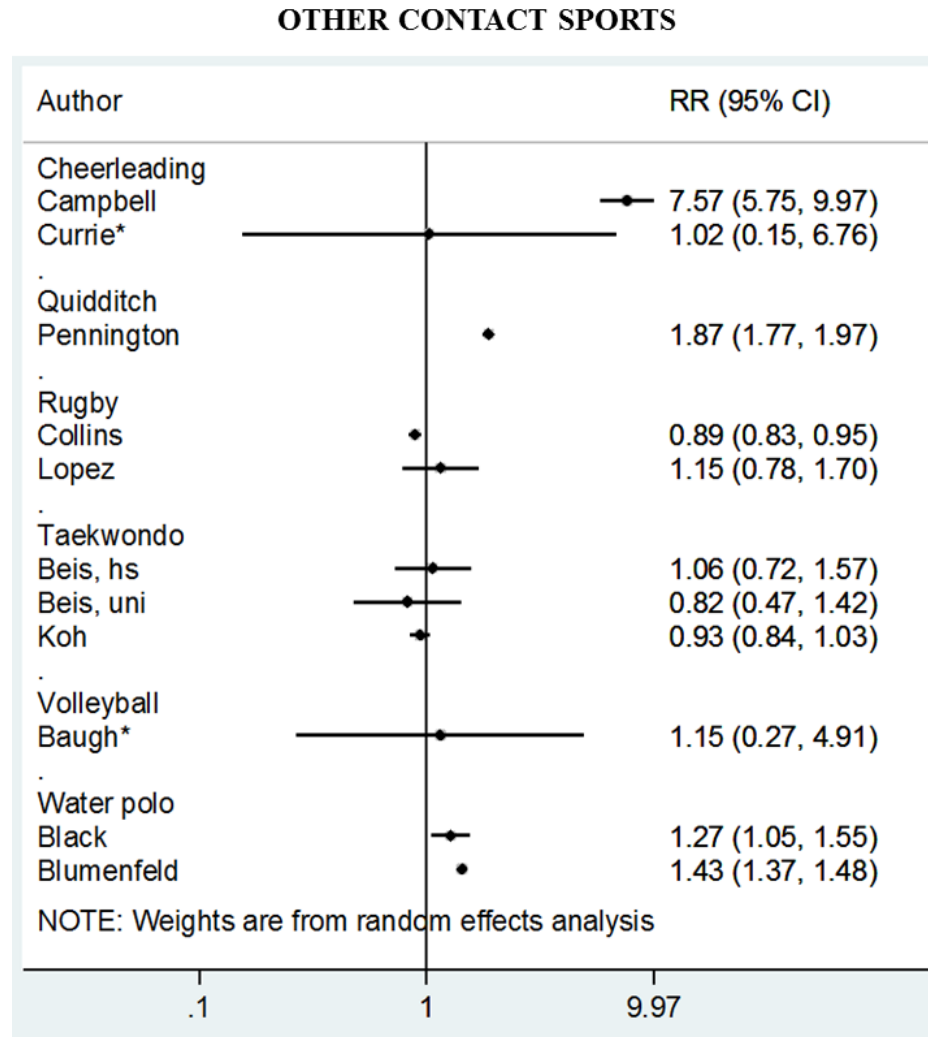

Forest plot of concussion incidence rate ratios for other contact sports. C: some competition; p: practice only; hs: high school or below; uni: university or above. \*based on 10,000 athlete-exposures.

**Figure A9. Forest plot of concussion incidence rate ratios for other non-contact sports**

**OTHER NON-CONTACT SPORTS**

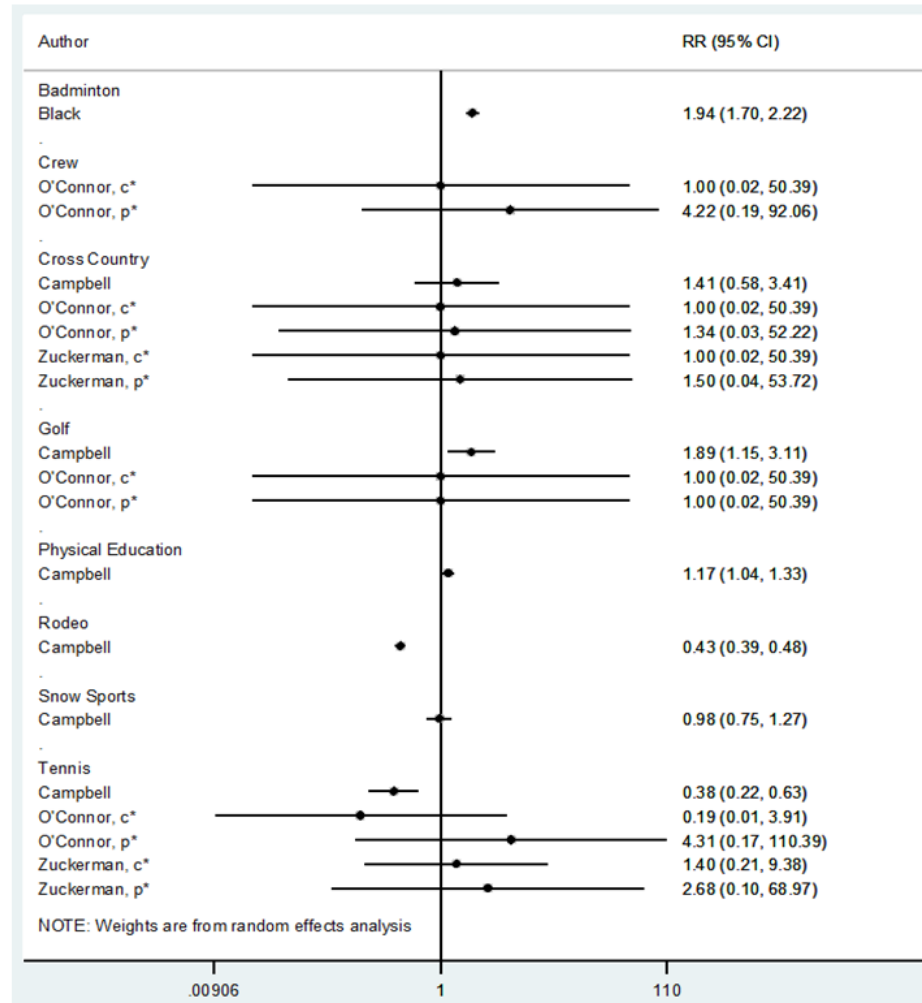

Forest plot of concussion incidence rate ratios for other non-contact sports. C: some competition; p: practice only; hs: high school or below; uni: university or above. \*based on 10,000 athlete-exposures.
